# Supplementary material
Source: PubMed Central journal article supplement (PMC3175070)
Supplement: mmc4.pdf [file mmc4.pdf]

Suppl\_Figure\_4\_Rev.tif

**Time from Diagnosis to Transplantation and Aging Parameters**

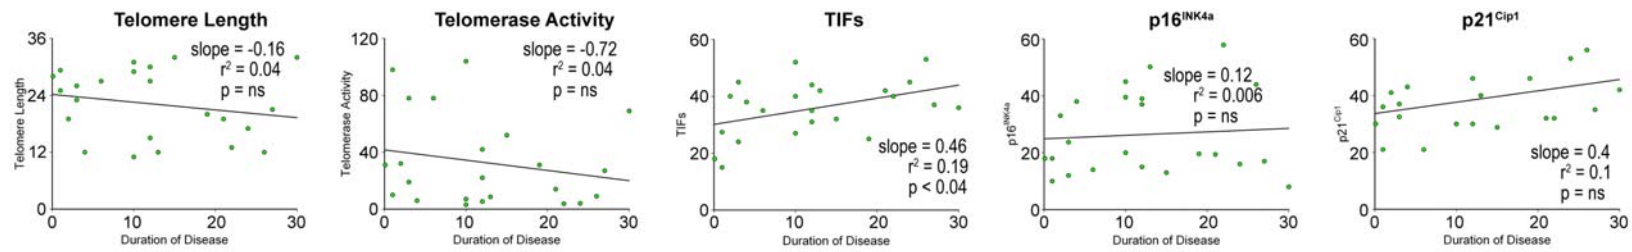

**Time from the Onset of Heart Failure to Transplantation and Aging Parameters**

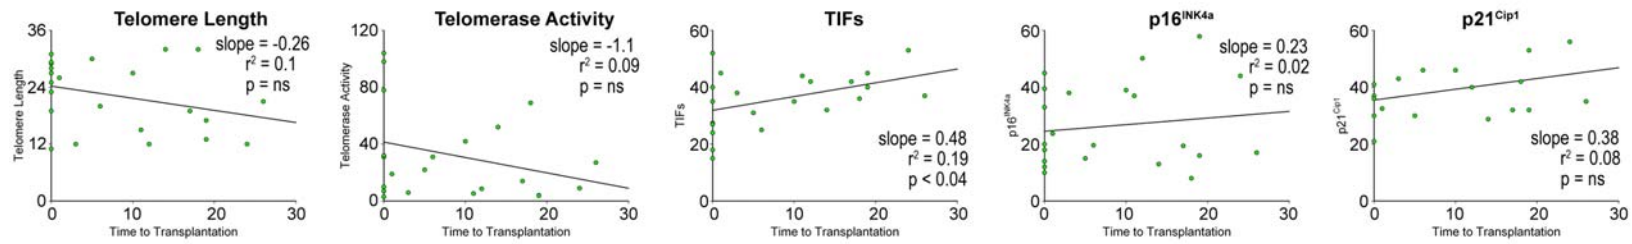

**Supplemental Figure 4**
