# Supplementary material
Source: PubMed Central journal article supplement (PMC3175070)

Suppl\_Figure\_1\_Rev.tif

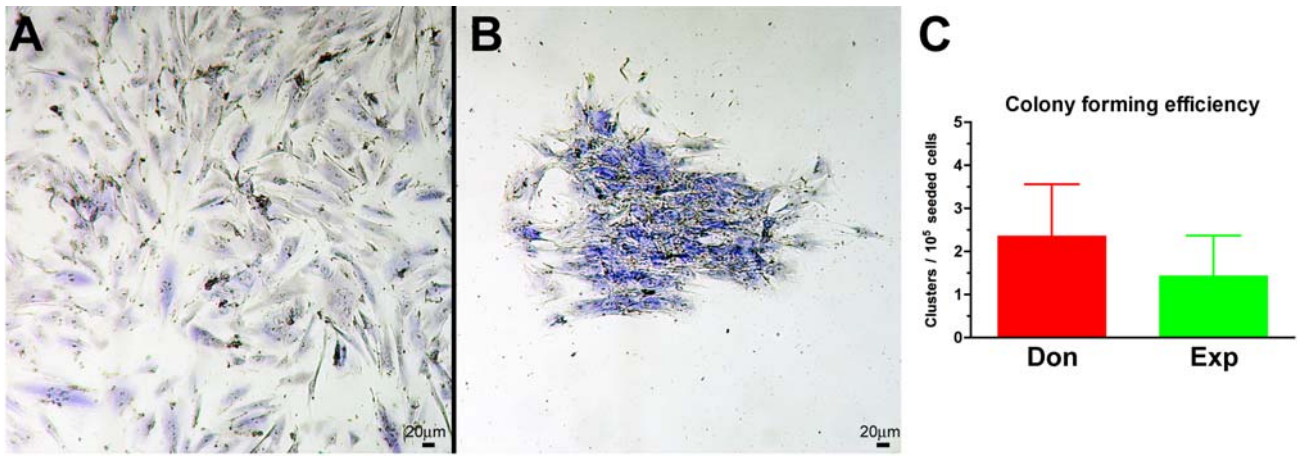

Supplemental Figure 1

Supplement: mmc1.pdf [file mmc1.pdf]

Suppl\_Figure\_2\_Rev.tif

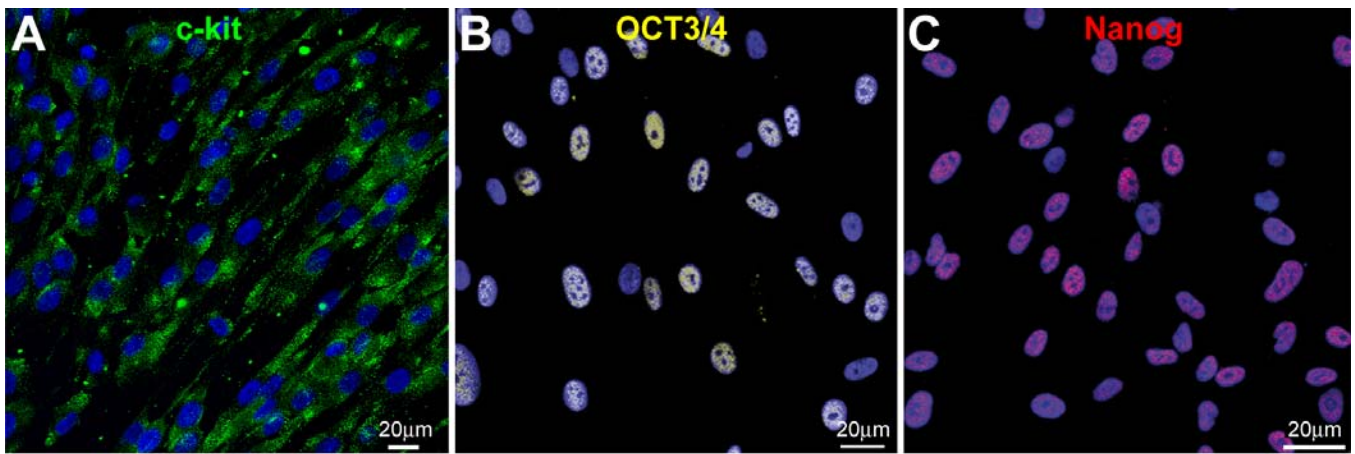

**Supplemental Figure 2**

Supplement: mmc2.pdf [file mmc2.pdf]

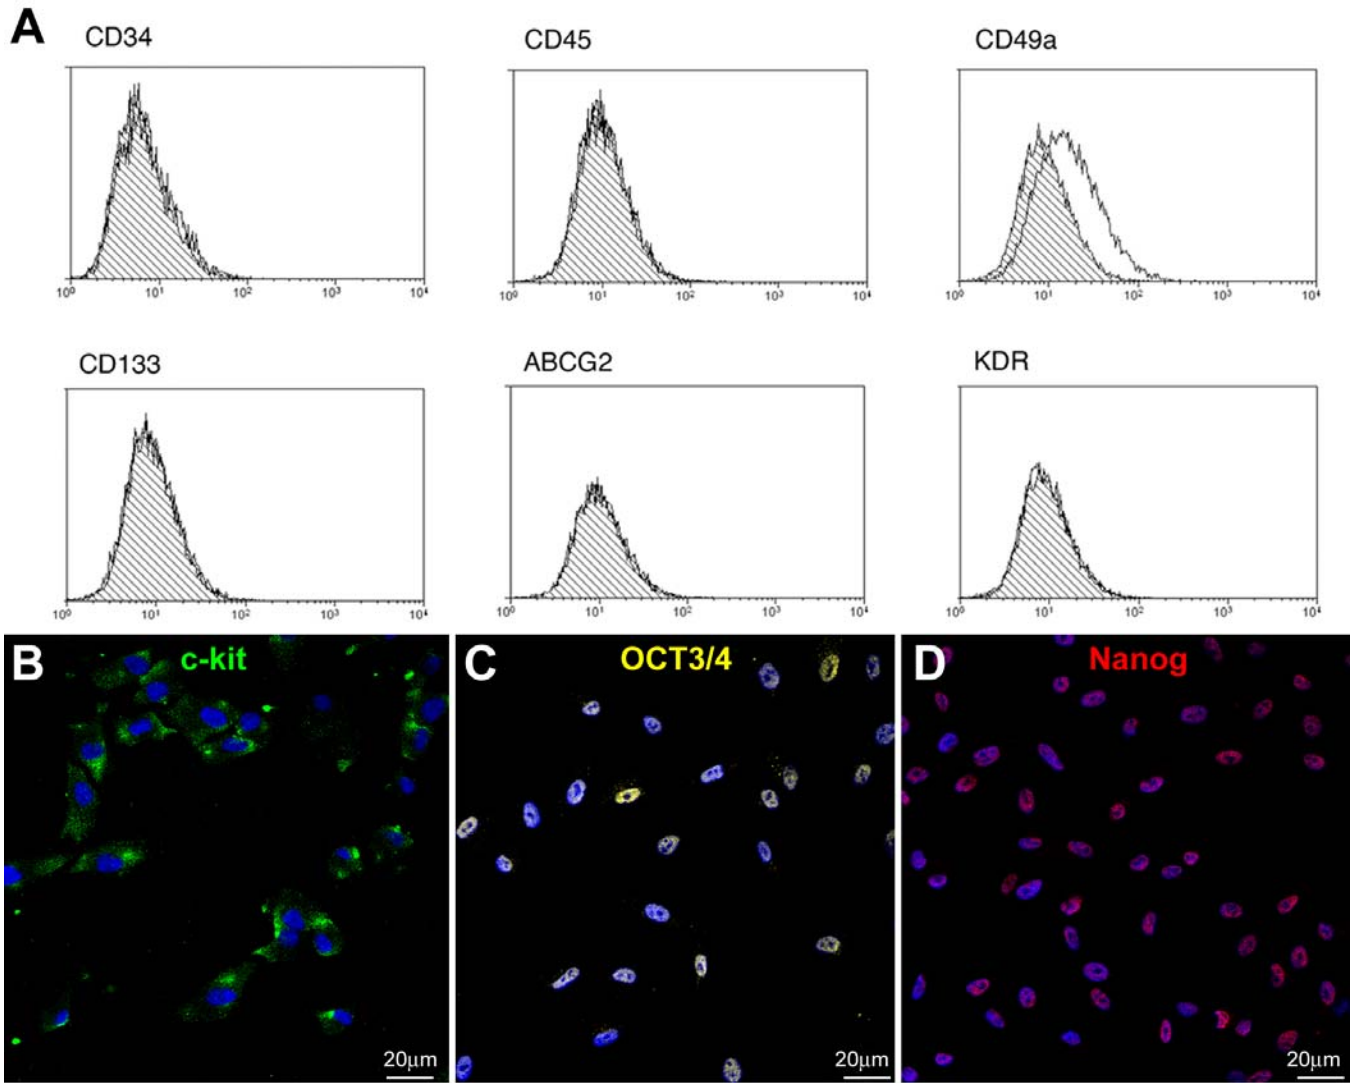

**Supplemental Figure 3**

Supplement: mmc3.pdf [file mmc3.pdf]

Suppl\_Figure\_5\_Rev.tif

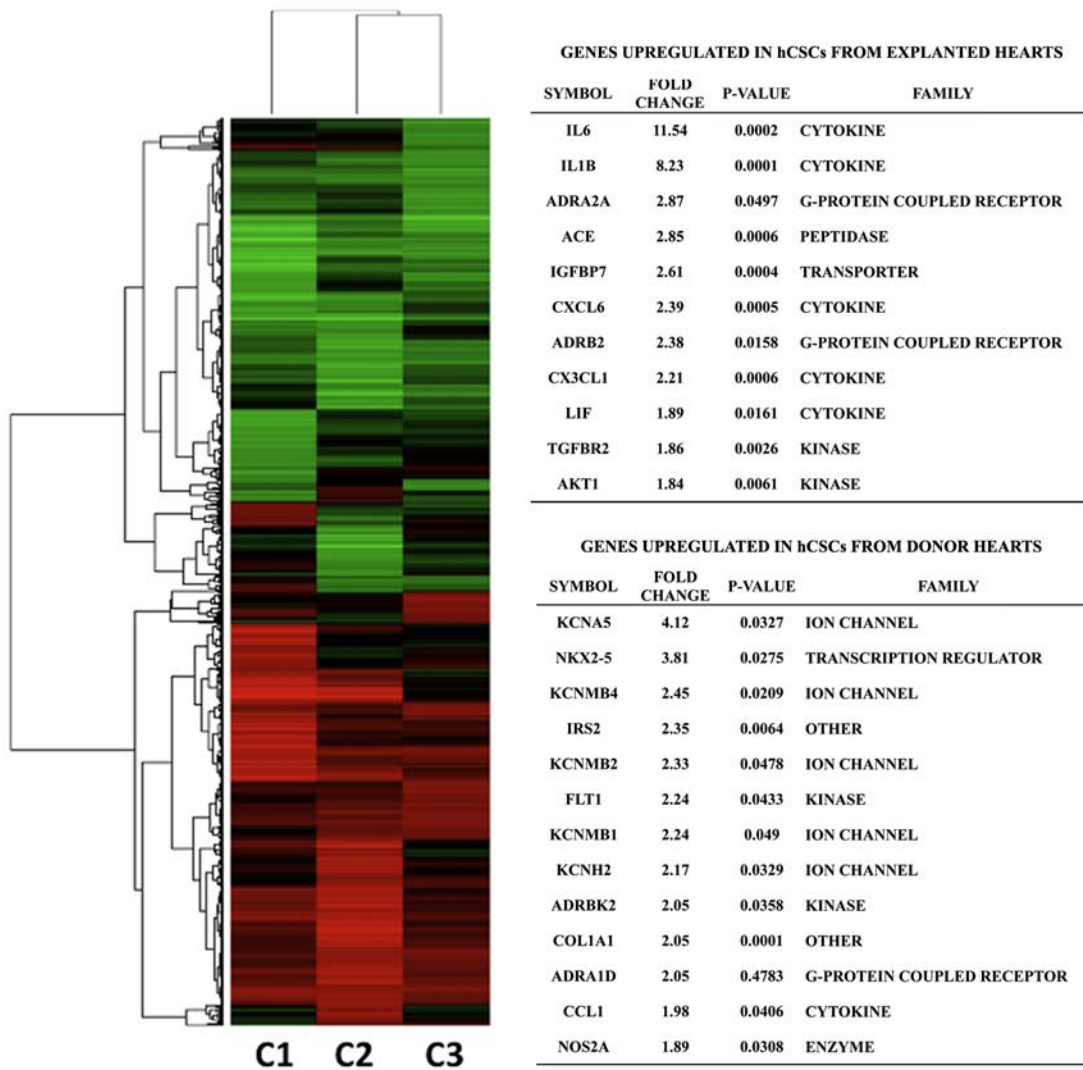

Supplemental Figure 5

Supplement: mmc5.pdf [file mmc5.pdf]

Suppl\_Figure\_6\_Rev.tif

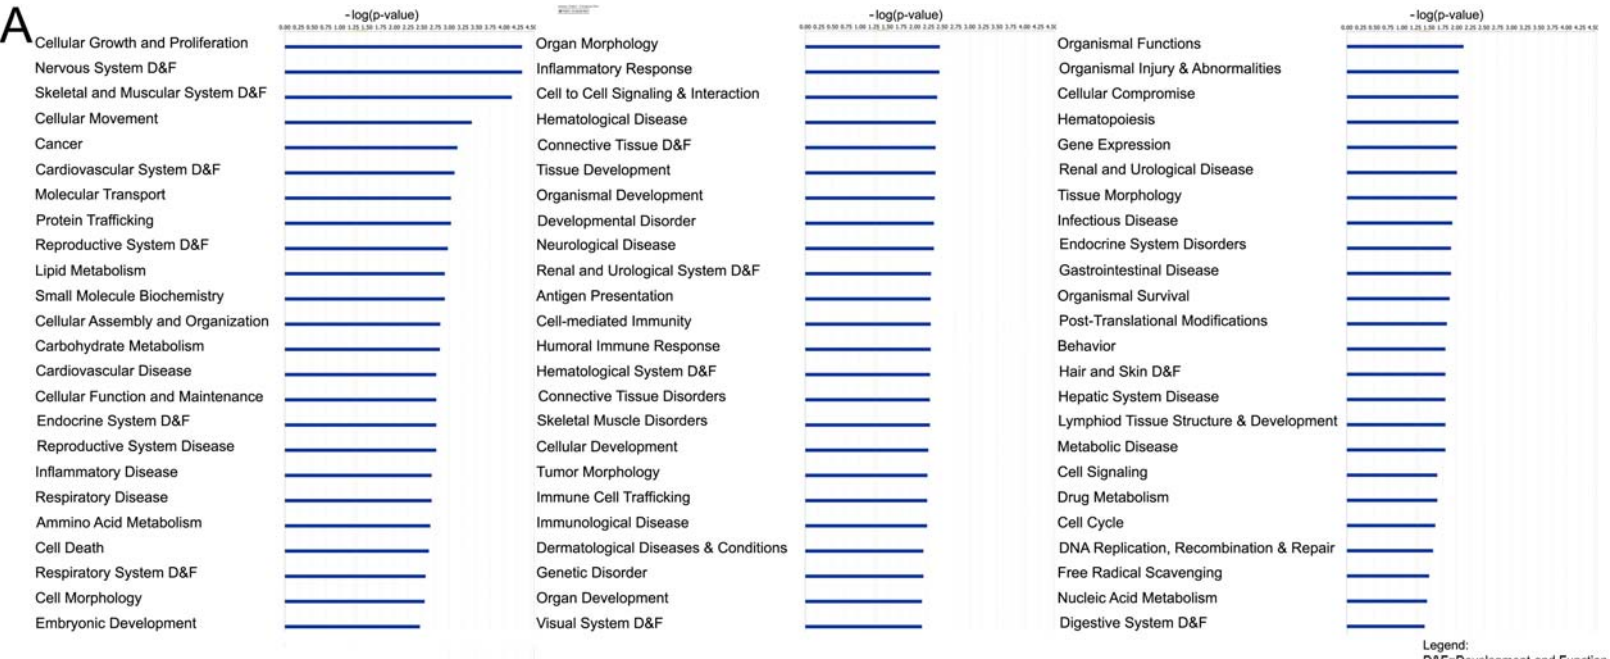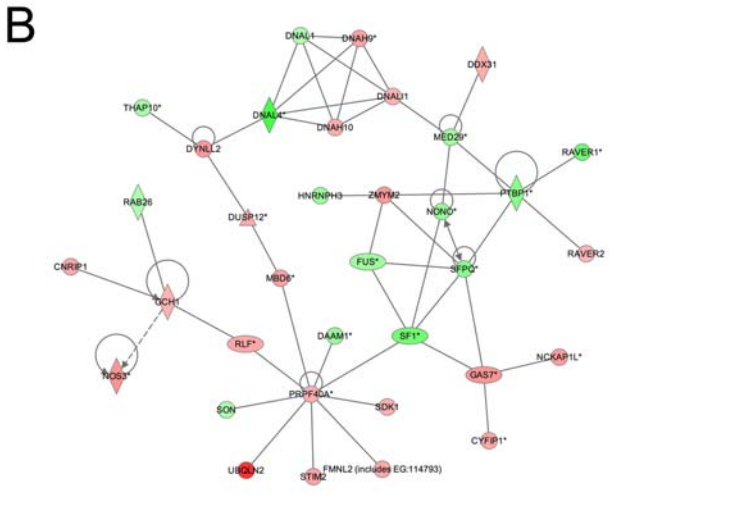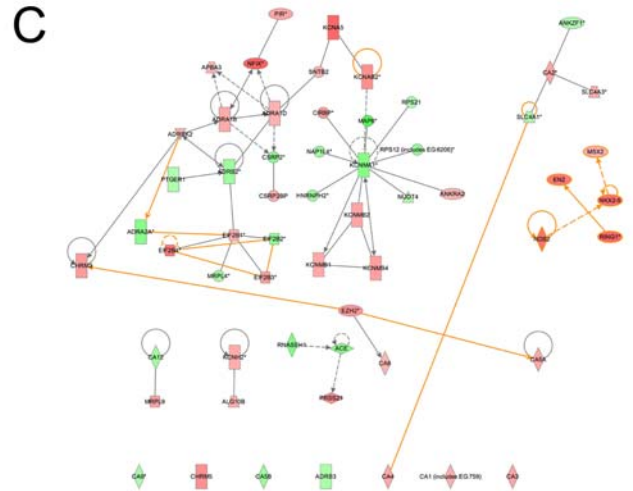

Supplemental Figure 6

Supplement: mmc6.pdf [file mmc6.pdf]
